# Supplementary material
Source: HighWire-hosted journal article supplement (https://bjsm.bmj.com/content/54/11/652)
Supplement: inline-supplementary-material-1 [file inline-supplementary-material-1.docx]

# Appendix 1: Search strategy

## MEDLINE

## 1 Menisci, Tibial/

## 2 (tear* adj3 medial*).ti,ab.

## 3 (menisc* adj3 tear*).ti,ab.

## 4 (menisc* adj3 injur*).ti,ab.

## 5 1 or 2 or 3 or 4

## 6 Arthroscopy/

## 7 arthroscop*.ti,ab.

## 8 meniscectom*.mp.

## 9 6 or 7 or 8

## 10 (random$ or placebo$ or single blind$ or double blind$ or triple blind$).ti,ab.

## 11 Randomized controlled trial.pt.

## 12 Controlled clinical trial.pt.

## 13 Clinical trials as topic/

## 14 trial.ti.

## 15 Comparative Study/

## 16 cohort*.ti,ab.

## 17 10 or 11 or 12 or 13 or 14 or 15 or 16

## 18 5 and 9 and 17

## Embase

1 knee meniscus/

2 (tear* adj3 medial*).ti,ab.

3 (menisc* adj3 tear*).ti,ab.

4 (menisc* adj3 injur*).ti,ab.

5 1 or 2 or 3 or 4

6 Arthroscopy/

7 arthroscop*.ti,ab.

8 meniscectom*.mp.

9 8 or 6 or 7

10 exp Randomized Controlled Trial/ or exp Single Blind Procedure/ or exp Double Blind Procedure/ or Crossover Procedure/

11 (random* or RCT or placebo or allocat* or crossover* or 'cross over' or trial or (doubl* adj1 blind*) or (singl* adj1 blind*)).ti,ab.

12 Comparative Study/

13 cohort*.ti,ab.

14 10 or 11 or 12 or 13

15 5 and 9 and 14

## CENTRAL

1 MeSH descriptor: [Menisci, Tibial] this term only
2 menisc*:ti,ab,kw (Word variations have been searched)
3 knee or tibia* (Word variations have been searched)
4 2 and 3
5 1 or 4
6 MeSH descriptor: [Sprains and Strains] this term only
7 MeSH descriptor: [Athletic Injuries] this term only
8 MeSH descriptor: [Knee Injuries] this term only
9 tear* or injur* or lesion*:ti,ab,kw (Word variations have been searched)
10 Any MeSH descriptor with qualifier(s): [Injuries - IN, Surgery - SU]
11 6 or 7 or 8 or 9 or 10
12 5 and 11

## Scopus

1 ( TITLE-ABS-KEY ( tear* W/3 medial* ) ) OR ( TITLE-ABS-KEY ( menisc* W/3 tear* ) ) OR ( TITLE-ABS-KEY ( menisc* W/3 injur* ) ) ) AND ( TITLE-ABS-KEY ( arthroscop* OR meniscectom* ) ) AND ( ( TITLE-ABS-KEY ( ( random* OR rct OR placebo OR allocat* OR crossover* OR "cross over" OR trial OR ( doubl* W/1 blind* ) OR ( singl* W/1 blind* ) ) ) ) OR ( TITLE-ABS-KEY ( control* W/1 trial* ) ) OR ( TITLE-ABS-KEY ( cohort* ) ) )

## Web of Science Core Collection

1 TOPIC: (tear* near/3 medial*) OR TITLE: (tear* near/3 medial*)

2 TOPIC: (menisc* near/3 tear*) OR TITLE: (menisc* near/3 tear*)

3 TOPIC: (menisc* near/3 injur*) OR TITLE: (menisc* near/3 injur*)

4 OR/1-3

5 TOPIC: (arthroscop* OR meniscectom*) OR TITLE: (arthroscop* OR meniscectom*)

6 TOPIC: (random* OR rct OR placebo OR allocat* OR crossover* OR "cross over" OR trial OR (doubl* near/1 blind*) OR (singl* near/1 blind*)) OR TITLE: (random* OR rct OR placebo OR allocat* OR crossover* OR "cross over" OR trial OR (doubl* near/1 blind*) OR (singl* near/1 blind*))

7 TOPIC: (control* near/1 trial*) OR TITLE: (control* near/1 trial*)

8 TOPIC: (cohort*) OR TITLE: (cohort*)

9 OR/6-8

10 4 AND 5 AND 9
